# Supplementary material
Source: bioRxiv or medRxiv preprint supplement (https://www.biorxiv.org/highwire/filestream/10460/field_highwire_adjunct_files/0/030395-1.pdf)
Supplement: Supplementary file [file 030395-1.pdf]

| chromosome | Avail. SNPs | QC SNPs   | LD-pruned SNPs |
|------------|-------------|-----------|----------------|
| Chrom. 1   | 4 978 489   | 158 858   | 116 038        |
| Chrom. 2   | 4 331 584   | 136 735   | 100 011        |
| Chrom. 3   | 5 424 868   | 165 394   | 121 174        |
| Chrom. 4   | 5 414 544   | 170 726   | 123 580        |
| Chrom. 5   | 4 496 375   | 133 727   | 98 578         |
| Chrom. 6   | 3 650 081   | 97 328    | 72 271         |
| Chrom. 7   | 4 761 519   | 151 101   | 111 584        |
| Chrom. 8   | 4 377 934   | 135 847   | 99 935         |
| total      | 37 435 394  | 1 149 716 | 843 171        |

**Table S 1.** SNP selection process for admixture analysis.

Quality Checked (QC) SNPs : genotyping rate  $\geq 0.95$  and Minor Allele Frequency  $\geq 0.01$ . LD-pruned SNPs : Variance Inflation Factor  $\leq 1.22$  in a window of 300 SNPs.

|                        | Estimate | Std. Error | t value | Pr(> t ) |
|------------------------|----------|------------|---------|----------|
| Intercept              | 2.7362   | 0.1237     | 22.12   | 0.0000   |
| Algiers                | -1.2335  | 0.2816     | -4.38   | 0.0000   |
| Spanish Coastal        | -1.1635  | 0.2353     | -4.95   | 0.0000   |
| North Tunisian Coastal | -1.4798  | 0.3648     | -4.06   | 0.0001   |
| Atlas                  | -0.7511  | 0.1918     | -3.92   | 0.0001   |
| French                 | -0.5753  | 0.1963     | -2.93   | 0.0038   |
| Greek                  | -0.3084  | 0.1812     | -1.70   | 0.0906   |

**Table S 3.** Linear model between admixture components and root rot index due to infection of *M. truncatula* by *Aphanomyces euteiches*.  
Data from Bonhomme *et al.* (Bonhomme *et al.*, 2013)

|                        | Estimate | Std. Error | t value | Pr(> t ) |
|------------------------|----------|------------|---------|----------|
| intercept              | 14.1608  | 0.3506     | 40.39   | 0.0000   |
| South Tunisian Coastal | 5.7582   | 1.1345     | 5.08    | 0.0000   |
| Greek                  | 3.6659   | 0.6954     | 5.27    | 0.0000   |
| North Tunisian Coastal | 5.0274   | 1.1228     | 4.48    | 0.0000   |
| Spanish Coastal        | 3.7344   | 0.9770     | 3.82    | 0.0002   |

(a) Linear model between admixture components and plant height (final height before harvest).

|           | Estimate | Std. Error | t value | Pr(> t ) |
|-----------|----------|------------|---------|----------|
| intercept | 2.8234   | 0.0444     | 63.54   | 0.0000   |
| French    | -0.4447  | 0.1482     | -3.00   | 0.0030   |
| Atlas     | 0.1995   | 0.1007     | 1.98    | 0.0488   |

(b) Linear model between admixture components and number of leaves at about two weeks.

|                        | Estimate | Std. Error | t value | Pr(> t ) |
|------------------------|----------|------------|---------|----------|
| intercept              | 14.7805  | 0.5198     | 28.44   | 0.0000   |
| Spanish Coastal        | 5.0685   | 1.7406     | 2.91    | 0.0040   |
| South Tunisian Coastal | -4.9235  | 2.0711     | -2.38   | 0.0183   |

(c) Linear model between admixture components and number of nodules below 5 cm of root growth.

|                        | Estimate | Std. Error | t value | Pr(> t ) |
|------------------------|----------|------------|---------|----------|
| intercept              | 5.1755   | 0.2108     | 24.55   | 0.0000   |
| South Tunisian Coastal | -2.4748  | 0.7870     | -3.14   | 0.0019   |
| Spanish Coastal        | 2.6320   | 0.6618     | 3.98    | 0.0001   |
| Algiers                | 3.1375   | 0.8330     | 3.77    | 0.0002   |

(d) Linear model between admixture components and number of nodules in top 5 cm of roots.

|                        | Estimate | Std. Error | t value | Pr(> t ) |
|------------------------|----------|------------|---------|----------|
| intercept              | 19.7448  | 0.6824     | 28.93   | 0.0000   |
| Spanish Coastal        | 7.9483   | 2.1422     | 3.71    | 0.0003   |
| South Tunisian Coastal | -7.1137  | 2.5473     | -2.79   | 0.0057   |
| Algiers                | 5.3812   | 2.6964     | 2.00    | 0.0472   |

(e) Linear model between admixture components and total number of nodules.

**Table S 4.** Linear models between *M. truncatula* admixture components and several quantitative functional traits.

(a) Linear model between admixture components and number of nodules below 5 cm of root growth. (b) Linear model between admixture components and number of nodules in top 5 cm of roots. (c) Linear model between admixture components and total number of nodules. (d) Linear model between admixture components and plant height (final height before harvest). (e) Linear model between admixture components and number of leaves at about two weeks. For each phenotype, the scale from low values (blue) to high values (red) is indicated on the right. Raw data from Stanton-Geddes *et al.* (Stanton-Geddes *et al.*, 2013)

| Bioclimatic variable                                             | Type               | Algiers | Spanish Coastal | North Tunisian Coastal | Atlas Tunisian Coastal | South Tunisian Coastal | French | Greek | Spanish-Morocco Inland |
|------------------------------------------------------------------|--------------------|---------|-----------------|------------------------|------------------------|------------------------|--------|-------|------------------------|
| BIO1: Annual Mean Temperature                                    | Annual trend       | -0.13   | 0.03            | 0.16                   | -0.05                  | 0.26                   | -0.45  | 0.12  | 0.08                   |
| BIO2: Mean Diurnal Range (Mean of monthly (max temp - min temp)) | Seasonality        | -0.15   | -0.16           | 0.1                    | 0.4                    | 0.02                   | -0.48  | -0.09 | 0.18                   |
| BIO3: Isothermality (BIO2/BIO7) (* 100)                          | Seasonality        | -0.26   | 0.15            | 0.09                   | 0.08                   | 0.15                   | -0.42  | -0.02 | 0.18                   |
| BIO4: Temperature Seasonality (standard deviation *100)          | Seasonality        | 0.1     | -0.42           | 0.05                   | 0.47                   | -0.07                  | -0.25  | -0.01 | -0.06                  |
| BIO5: Max Temperature of Warmest Month                           | Extreme conditions | -0.09   | -0.22           | 0.16                   | 0.41                   | 0.07                   | -0.6   | -0.05 | 0.15                   |
| BIO6: Min Temperature of Coldest Month                           | Extreme conditions | -0.1    | 0.22            | 0.08                   | -0.29                  | 0.2                    | -0.11  | 0.12  | 0.01                   |
| BIO7: Temperature Annual Range (BIO5-BIO6)                       | Seasonality        | -0.01   | -0.31           | 0.07                   | 0.5                    | -0.07                  | -0.4   | -0.11 | 0.11                   |
| BIO8: Mean Temperature of Wettest Quarter                        | Extreme conditions | -0.19   | 0.21            | -0.02                  | -0.29                  | 0.2                    | 0.16   | 0.03  | 0.02                   |
| BIO9: Mean Temperature of Driest Quarter                         | Extreme conditions | -0.01   | -0.17           | 0.13                   | 0.17                   | 0.14                   | -0.48  | 0.1   | 0.05                   |
| BIO10: Mean Temperature of Warmest Quarter                       | Extreme conditions | -0.06   | -0.17           | 0.18                   | 0.19                   | 0.21                   | -0.57  | 0.07  | 0.08                   |
| BIO11: Mean Temperature of Coldest Quarter                       | Extreme conditions | -0.13   | 0.18            | 0.11                   | -0.21                  | 0.24                   | -0.28  | 0.09  | 0.1                    |
| BIO12: Annual Precipitation                                      | Annual trend       | 0.06    | -0.01           | -0.17                  | -0.03                  | -0.28                  | 0.41   | 0.05  | -0.08                  |
| BIO13: Precipitation of Wettest Month                            | Extreme conditions | 0.05    | -0.01           | -0.16                  | -0.19                  | -0.12                  | 0.1    | 0.39  | -0.11                  |
| BIO14: Precipitation of Driest Month                             | Extreme conditions | -0.09   | -0.07           | -0.08                  | 0                      | -0.1                   | 0.56   | -0.06 | -0.17                  |
| BIO15: Precipitation Seasonality (Coefficient of Variation)      | Seasonality        | -0.01   | 0.08            | -0.04                  | -0.3                   | 0.15                   | -0.41  | 0.45  | 0.1                    |
| BIO16: Precipitation of Wettest Quarter                          | Extreme conditions | 0.07    | 0.02            | -0.17                  | -0.16                  | -0.16                  | 0.12   | 0.33  | -0.1                   |
| BIO17: Precipitation of Driest Quarter                           | Extreme conditions | -0.05   | -0.08           | -0.08                  | 0.06                   | -0.13                  | 0.62   | -0.15 | -0.2                   |
| BIO18: Precipitation of Warmest Quarter                          | Extreme conditions | -0.06   | -0.08           | -0.02                  | 0.04                   | -0.08                  | 0.65   | -0.17 | -0.25                  |
| BIO19: Precipitation of Coldest Quarter                          | Extreme conditions | 0.08    | 0               | -0.13                  | -0.09                  | -0.13                  | -0.03  | 0.29  | -0.06                  |

**Table S 5.** Correlations between admixture components and 19 bioclimatic variables defined by WorldClim.

| Bioclimatic variable | Algiers | Spanish Coastal | North Tunisian Coastal | Atlas | South Tunisian Coastal | French | Greek | Spanish-Morocco Inland |
|----------------------|---------|-----------------|------------------------|-------|------------------------|--------|-------|------------------------|
| BIO1                 | 1.000   | 1.000           | 1.000                  | 1.000 | 0.004                  | 0.000  | 1.000 | 1.000                  |
| BIO2                 | 1.000   | 1.000           | 1.000                  | 0.000 | 1.000                  | 0.000  | 1.000 | 0.584                  |
| BIO3                 | 0.005   | 1.000           | 1.000                  | 1.000 | 1.000                  | 0.000  | 1.000 | 0.445                  |
| BIO4                 | 1.000   | 0.000           | 1.000                  | 0.000 | 1.000                  | 0.013  | 1.000 | 1.000                  |
| BIO5                 | 1.000   | 0.063           | 1.000                  | 0.000 | 1.000                  | 0.000  | 1.000 | 1.000                  |
| BIO6                 | 1.000   | 0.075           | 1.000                  | 0.000 | 0.193                  | 1.000  | 1.000 | 1.000                  |
| BIO7                 | 1.000   | 0.000           | 1.000                  | 0.000 | 1.000                  | 0.000  | 1.000 | 1.000                  |
| BIO8                 | 0.285   | 0.113           | 1.000                  | 0.001 | 0.238                  | 1.000  | 1.000 | 1.000                  |
| BIO9                 | 1.000   | 0.655           | 1.000                  | 0.827 | 1.000                  | 0.000  | 1.000 | 1.000                  |
| BIO10                | 1.000   | 0.797           | 0.474                  | 0.313 | 0.090                  | 0.000  | 1.000 | 1.000                  |
| BIO11                | 1.000   | 0.453           | 1.000                  | 0.094 | 0.025                  | 0.001  | 1.000 | 1.000                  |
| BIO12                | 1.000   | 1.000           | 0.756                  | 1.000 | 0.001                  | 0.000  | 1.000 | 1.000                  |
| BIO13                | 1.000   | 1.000           | 1.000                  | 0.278 | 1.000                  | 1.000  | 0.000 | 1.000                  |
| BIO14                | 1.000   | 1.000           | 1.000                  | 1.000 | 1.000                  | 0.000  | 1.000 | 0.797                  |
| BIO15                | 1.000   | 1.000           | 1.000                  | 0.000 | 1.000                  | 0.000  | 0.000 | 1.000                  |
| BIO16                | 1.000   | 1.000           | 0.876                  | 1.000 | 1.000                  | 1.000  | 0.000 | 1.000                  |
| BIO17                | 1.000   | 1.000           | 1.000                  | 1.000 | 1.000                  | 0.000  | 1.000 | 0.175                  |
| BIO18                | 1.000   | 1.000           | 1.000                  | 1.000 | 1.000                  | 0.000  | 0.910 | 0.011                  |
| BIO19                | 1.000   | 1.000           | 1.000                  | 1.000 | 1.000                  | 1.000  | 0.000 | 1.000                  |

**Table S 6.** p-values for significances of correlations between admixture components and 19 bioclimatic variables defined by WorldClim.

FDR=0.05.

|                         | nodules below 5 cm | be- | nodules above 5 cm | total number of nodules | plant height | number of leaves | of |
|-------------------------|--------------------|-----|--------------------|-------------------------|--------------|------------------|----|
| nodules below 5 cm      | 1.00               |     | 0.50               | 0.96                    | 0.11         | -0.01            |    |
| nodules above 5 cm      | 0.50               |     | 1.00               | 0.72                    | -0.09        | 0.13             |    |
| total number of nodules | 0.96               |     | 0.72               | 1.00                    | 0.06         | 0.03             |    |
| plant height            | 0.11               |     | -0.09              | 0.06                    | 1.00         | 0.10             |    |
| number of leaves        | -0.01              |     | 0.13               | 0.03                    | 0.10         | 1.00             |    |

**Table S 7.** Correlations between symbiosis-related traits.  
Data from Stanton-Geddes *et al.* (Stanton-Geddes *et al.*, 2013)

| Gene ID       | Annotation                                                 | Biological process                                                                                                                                                                                 |
|---------------|------------------------------------------------------------|----------------------------------------------------------------------------------------------------------------------------------------------------------------------------------------------------|
| Medtr1g045490 | calcium-binding EF hand protein                            | RNA splicing and endonucleolytic cleavage and ligation. Associated to Golgi apparatus and plasma membrane                                                                                          |
| Medtr2g009110 | splicing factor 3B subunit 1                               | mRNA processing                                                                                                                                                                                    |
| Medtr3g460780 | fasciclin-like arabinogalactan protein                     | Fasciclin domain-containing proteins are involved in cell adhesion. They may be important during plant shoot development and contribute to plant stem strength, and in response to abiotic stress. |
| Medtr3g027940 | DNA-damage-repair/toleration DRT100-like protein           | UV protection and response to UV.                                                                                                                                                                  |
| Medtr4g078220 | callose synthase-like protein                              | cell wall. Associated to leaf morphogenesis and to defense response via the salicylic acid mediated signaling pathway                                                                              |
| Medtr4g091580 | polyubiquitin 3                                            | cellular protein modification process and protein targeting to vacuole. response to UV-B                                                                                                           |
| Medtr5g037410 | tyrosine kinase family                                     | protein PTKs are critical components of cellular signaling pathways leading to cell growth and differentiation in animals.                                                                         |
| Medtr5g076220 | long-chain acyl-CoA synthetase                             | fatty acid biosynthetic process, mainly long-chain fatty acid metabolic process                                                                                                                    |
| Medtr6g033580 | sucrose proton symporter 2                                 | AtSUC2 is necessary for efficient transport of sucrose from source (leaves) to sink tissues.                                                                                                       |
| Medtr6g034870 | extensin-like region protein                               | cell wall                                                                                                                                                                                          |
| Medtr6g034920 | extensin-like region protein                               | cell wall                                                                                                                                                                                          |
| Medtr6g047750 | GRAS family transcription factor                           | DELTA protein are regulators of gibberellic acid, a plant hormone stimulating plant growth and development.                                                                                        |
| Medtr6g011890 | light-harvesting complex I chlorophyll A/B-binding protein | photosynthesis                                                                                                                                                                                     |
| Medtr7g060720 | PPR containing plant-like protein, putative                | Pentatricopeptide repeat (PPR) proteins are a huge family of proteins involved in controlling gene expression in mitochondria and chloroplasts.                                                    |
| Medtr7g023740 | polygalacturonase inhibitor                                | Associated to plant-type cell wall. Involved also in defense response via the abscisic acid and jasmonic acid mediated signaling pathway.                                                          |

**Table S 8.** Annotation of genes with significant purifying selection in the eight *M. truncatula* populations.

Genome Mt4.0 and annotation Mt4.0v2 were used for computations.

| Gene name     | chrom. | position | Pop.1<br>dN/dS | Pop.2<br>dN/dS | Pop.3<br>dN/dS | Pop.4<br>dN/dS | Pop.5<br>dN/dS | Pop.6<br>dN/dS | Pop.7<br>dN/dS | Pop.8<br>dN/dS | dN/dS max. | C.V. |
|---------------|--------|----------|----------------|----------------|----------------|----------------|----------------|----------------|----------------|----------------|------------|------|
| Medtr2g091025 | chr2   | 39142715 | 4.33           | 3.67           | 7.00           | 11.00          | 7.00           | 4.33           | 4.00           | 4.33           | 11.00      | 44.0 |
| Medtr3g028210 | chr3   | 8944365  | 3.00           | 6.00           | 6.00           | 6.00           | 6.00           | 2.00           | 2.00           | 3.00           | 6.00       | 44.9 |
| Medtr4g065007 | chr4   | 24342256 | 1.75           | 1.75           | 6.00           | 6.00           | 6.00           | 1.50           | 6.00           | 2.33           | 6.00       | 57.2 |
| Medtr4g080990 | chr4   | 31294716 | 6.00           | 2.33           | 2.67           | 2.67           | 5.00           | 2.67           | 2.67           | 7.00           | 7.00       | 47.5 |
| Medtr5g026500 | chr5   | 10886269 | 7.00           | —              | —              | 3.00           | —              | —              | 2.33           | 3.50           | 7.00       | 52.6 |
| Medtr5g058000 | chr5   | 23939885 | 10.00          | 2.50           | 5.00           | 5.00           | 5.00           | 5.00           | 5.00           | 2.50           | 10.00      | 46.3 |
| Medtr5g090170 | chr5   | 39278448 | 2.60           | 2.60           | 2.60           | 2.60           | 2.60           | 2.60           | 2.60           | 9.00           | 9.00       | 66.5 |
| Medtr7g029280 | chr7   | 10342607 | —              | 3.00           | 9.00           | 4.50           | —              | 3.00           | 3.00           | 3.00           | 9.00       | 56.5 |
| Medtr8g043650 | chr8   | 16776123 | 3.50           | 2.67           | 3.50           | 2.67           | 7.00           | 2.67           | 2.67           | 2.67           | 7.00       | 43.8 |
| Medtr8g013910 | chr8   | 4296399  | 8.00           | 4.00           | 2.00           | 2.00           | 2.00           | 2.00           | 2.00           | 2.00           | 8.00       | 71.3 |

**Table S 9.** Genes putatively under positive selection in at least one *M. truncatula* population, as determined by dN/dS analysis. Genome Mt4.0 and annotation Mt4.0v2 were used for computations.



| Gene ID       | Annotation                                                   | Biological process                                                                                                                                                                                              |
|---------------|--------------------------------------------------------------|-----------------------------------------------------------------------------------------------------------------------------------------------------------------------------------------------------------------|
| Medtr2g091025 | frigida-LIKE protein                                         | FRIGIDA confers a vernalization requirement in <i>Arabidopsis thaliana</i> . Independent loss-of-function alleles that result in a rapid-cycling habit in different accessions.                                 |
| Medtr3g028210 | anthocyanin 5-aromatic acyl-transferase anthocyan.           | Biological process unknown.                                                                                                                                                                                     |
| Medtr4g065007 | 2-oxoglutarate/malate translocator                           | The 2-oxoglutarate/malate translocator gene has an important role during seed storage in pea ( <i>Pisum sativum</i> ).                                                                                          |
| Medtr4g080990 | carboxy-terminal domain cyclin                               | DNA endoreduplication, regulation of cell cycle.                                                                                                                                                                |
| Medtr5g026500 | 3-hydroxy-3-methylglutaryl-coenzyme A reductase-like protein | HMGR catalyzes the first step of isoprenoid biosynthesis. In plants, this pathway provides precursors for for diverse functions, including membrane biogenesis, defense, and control of growth and development. |
| Medtr5g058000 | F-box/RNI/FBD-like domain protein, putative                  | Biological process unknown.                                                                                                                                                                                     |
| Medtr5g090170 | PPR containing plant-like protein                            | Pentatricopeptide repeat (PPR) proteins are involved in controlling gene expression in mitochondria and chloroplasts.                                                                                           |
| Medtr7g029280 | Transmembrane protein, putative                              | Transcription factor of the CCHC(Zn) class.                                                                                                                                                                     |
| Medtr8g043650 | MADS-box transcription factor family protein                 | Transcription factor activity. Biological process unknown.                                                                                                                                                      |
| Medtr8g013910 | Elongation factor 1-alpha                                    | Translation and nuclear export of proteins.                                                                                                                                                                     |

**Table S 10.** Annotation of genes with putative positive selection differing among the eight *M. truncatula* populations.

Genome Mt4.0 and annotation Mt4.0v2 were used for computations.

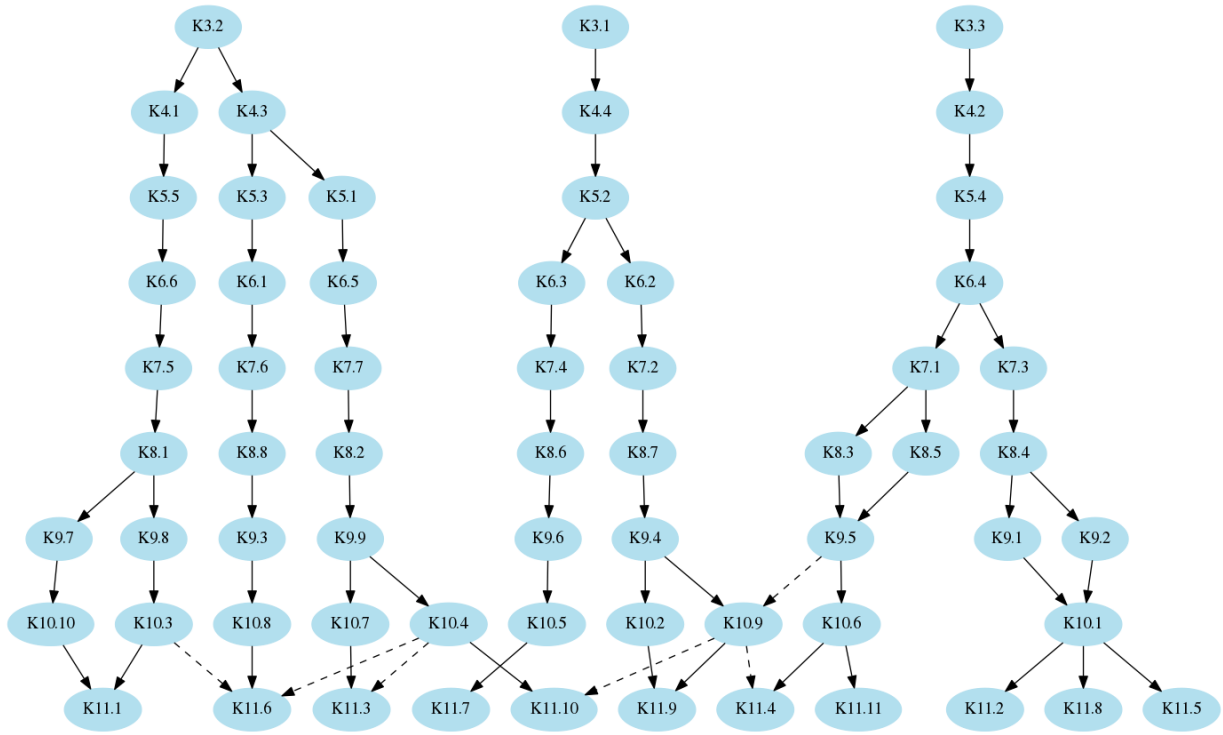

**Fig. S 1.** Splitting patterns of accessions' sets, based on clustering by admixture components, as  $K$  increases from  $K = 3$  to  $K = 11$ .

Dashed line indicates minor contribution of a population. Accessions's sets are labelled following their major genome component.

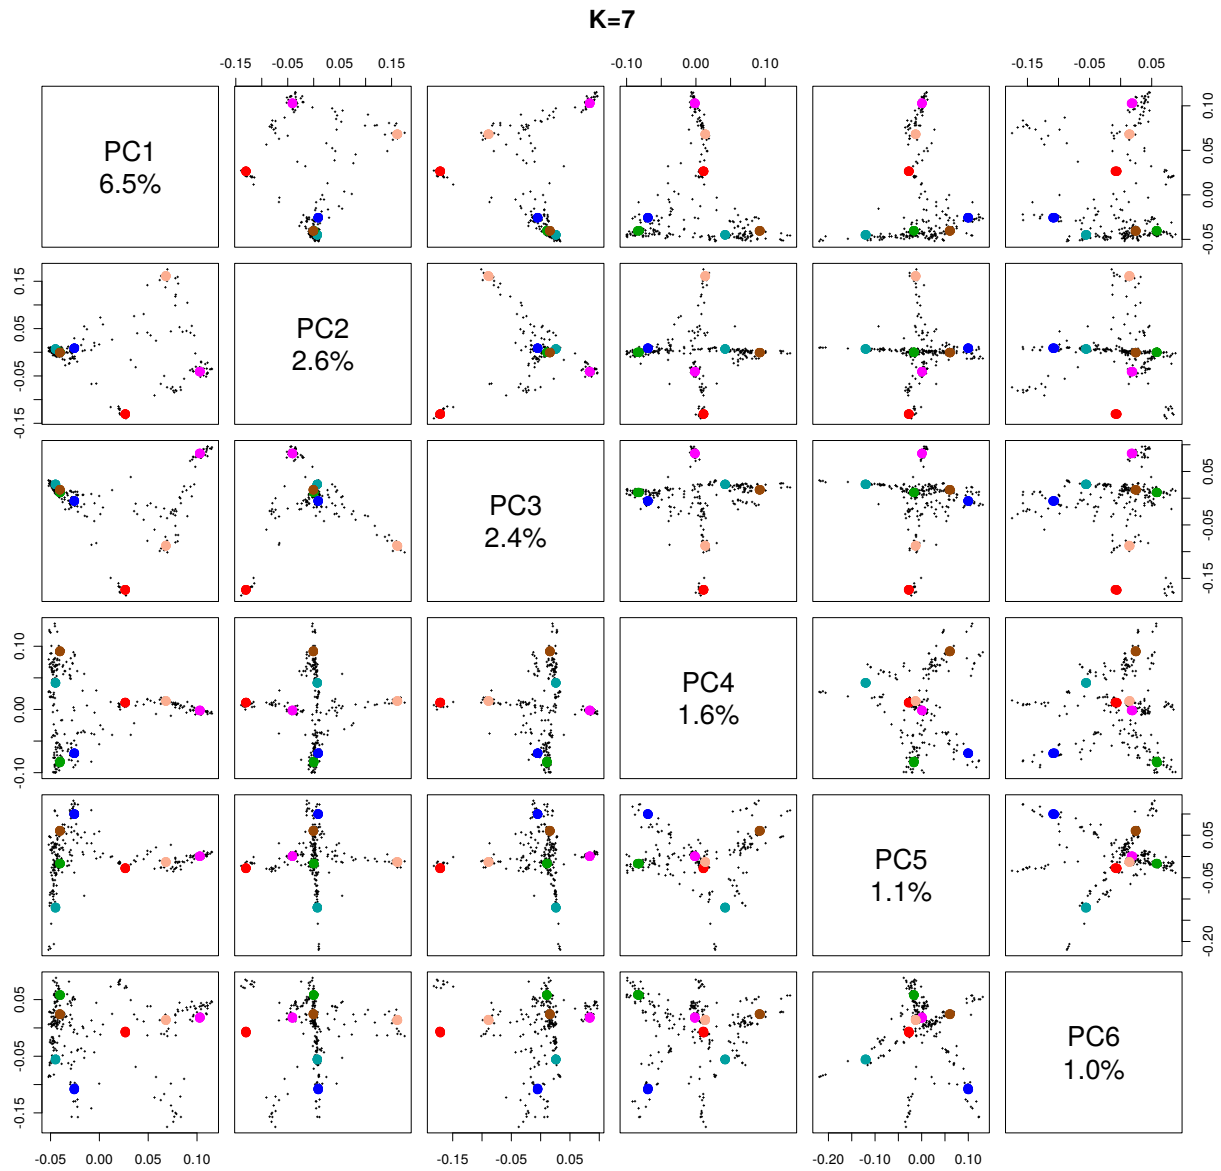

**Fig. S 2.** PCA plot of 262 *M. truncatula* accessions and the  $K = 7$  putative ancestral populations, for pairwise comparisons of the first six eigenvectors. Coloured points represent simulated individuals, one colour per admixture component.

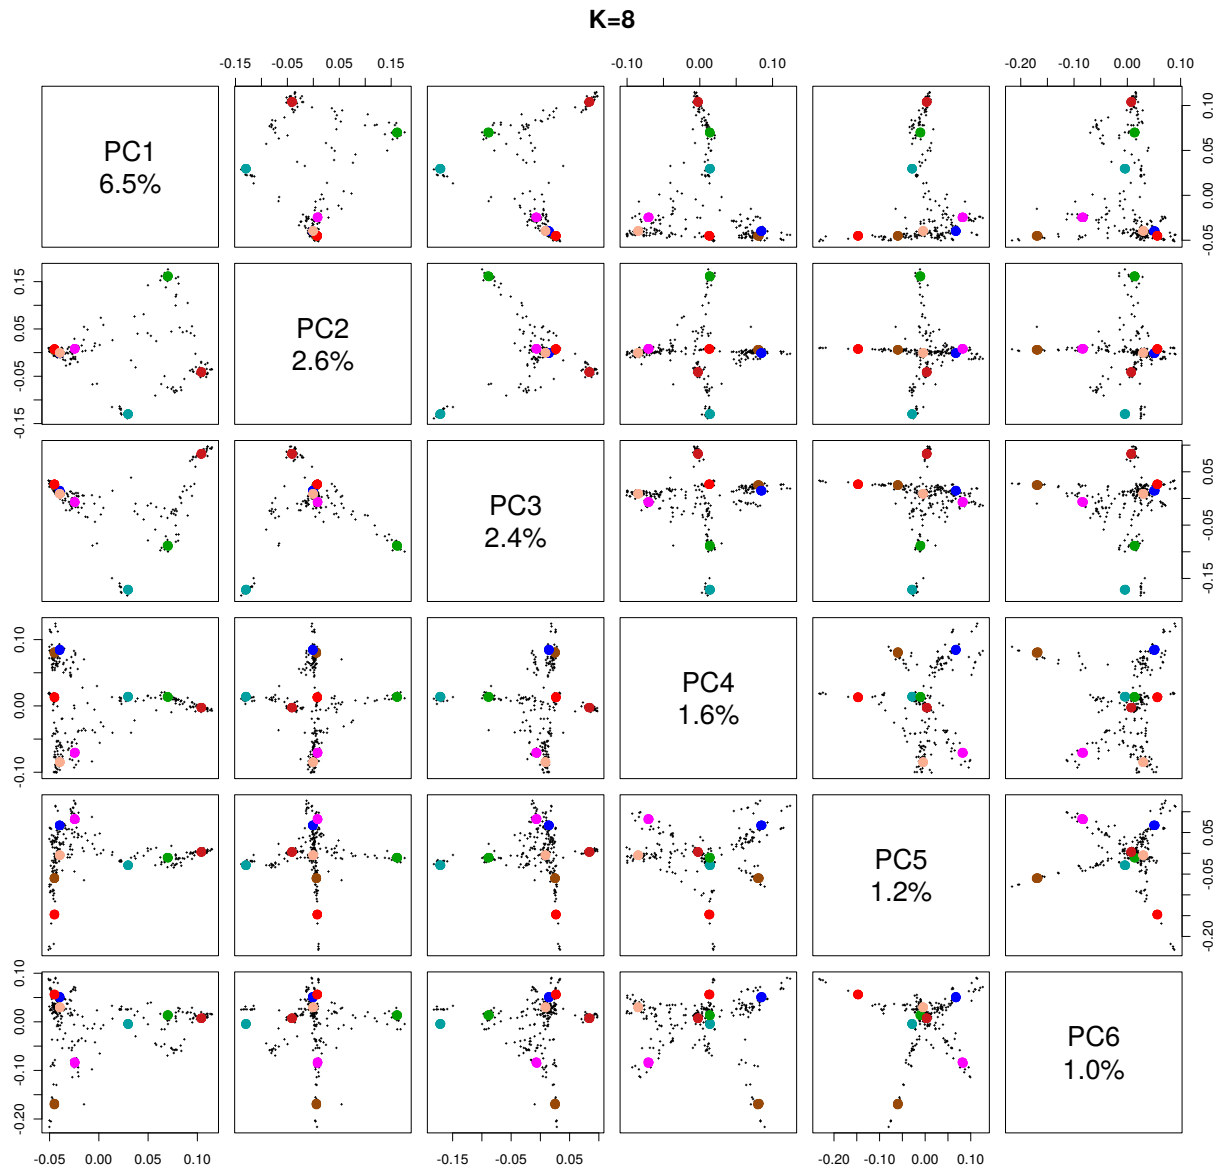

**Fig. S 3.** PCA plot of 262 *M. truncatula* accessions and the  $K = 8$  putative ancestral populations, for pairwise comparisons of the first six eigenvectors. Coloured points represent simulated individuals, one colour per admixture component.

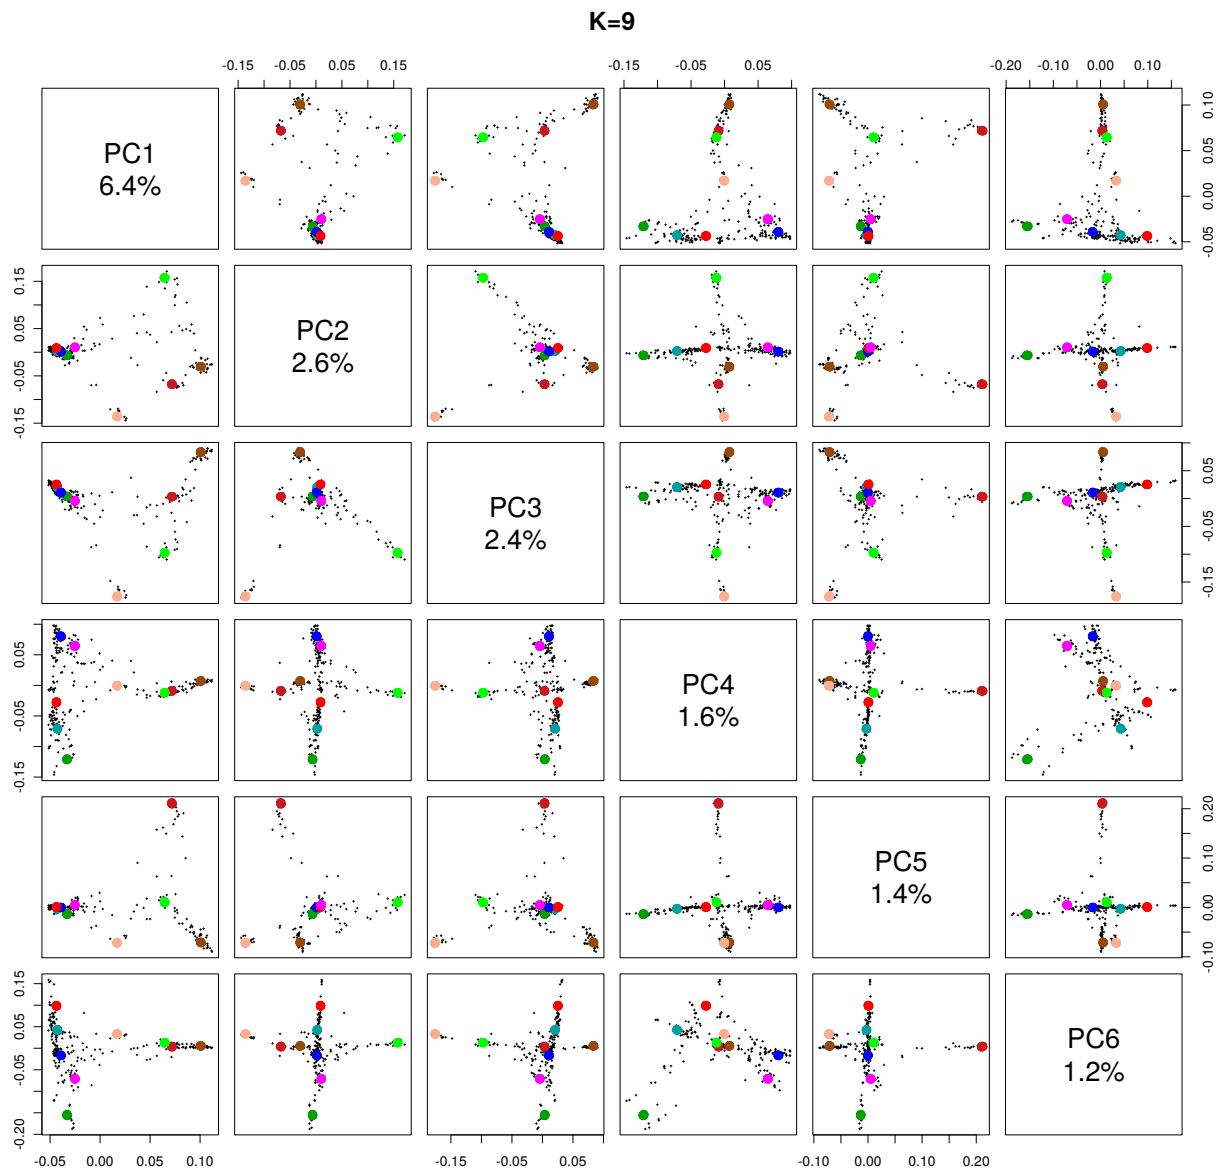

**Fig. S 4.** PCA plot of 262 *M. truncatula* accessions and the  $K = 9$  putative ancestral populations, for pairwise comparisons of the first six eigenvectors. Coloured points represent simulated individuals, one colour per admixture component.

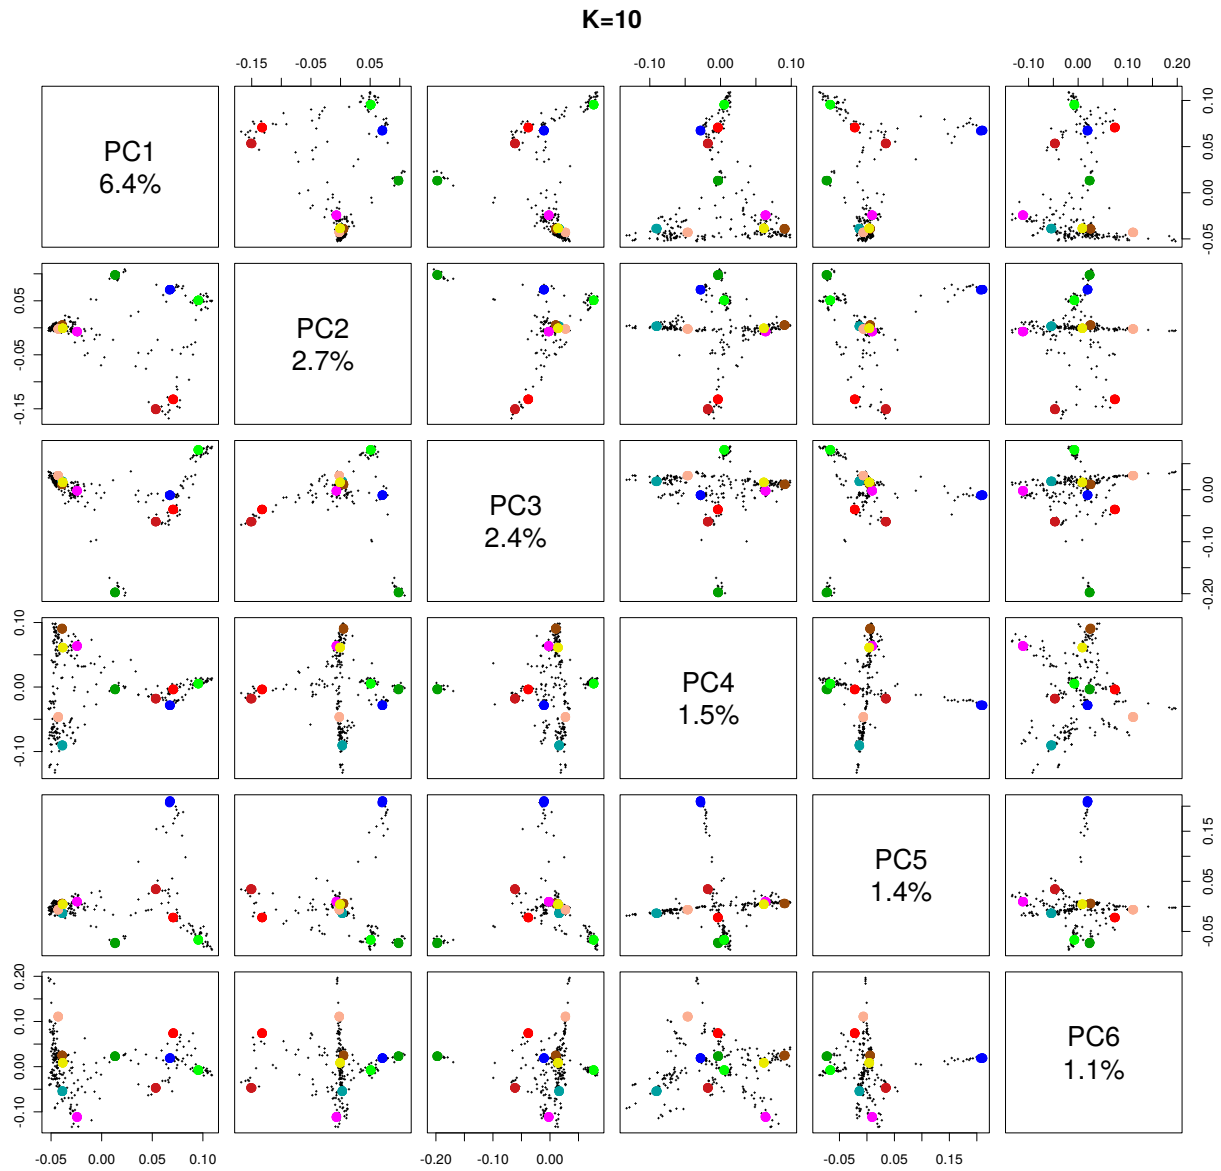

**Fig. S 5.** PCA plot of 262 *M. truncatula* accessions and the  $K = 10$  putative ancestral populations, for pairwise comparisons of the first six eigenvectors. Coloured points represent simulated individuals, one colour per admixture component.

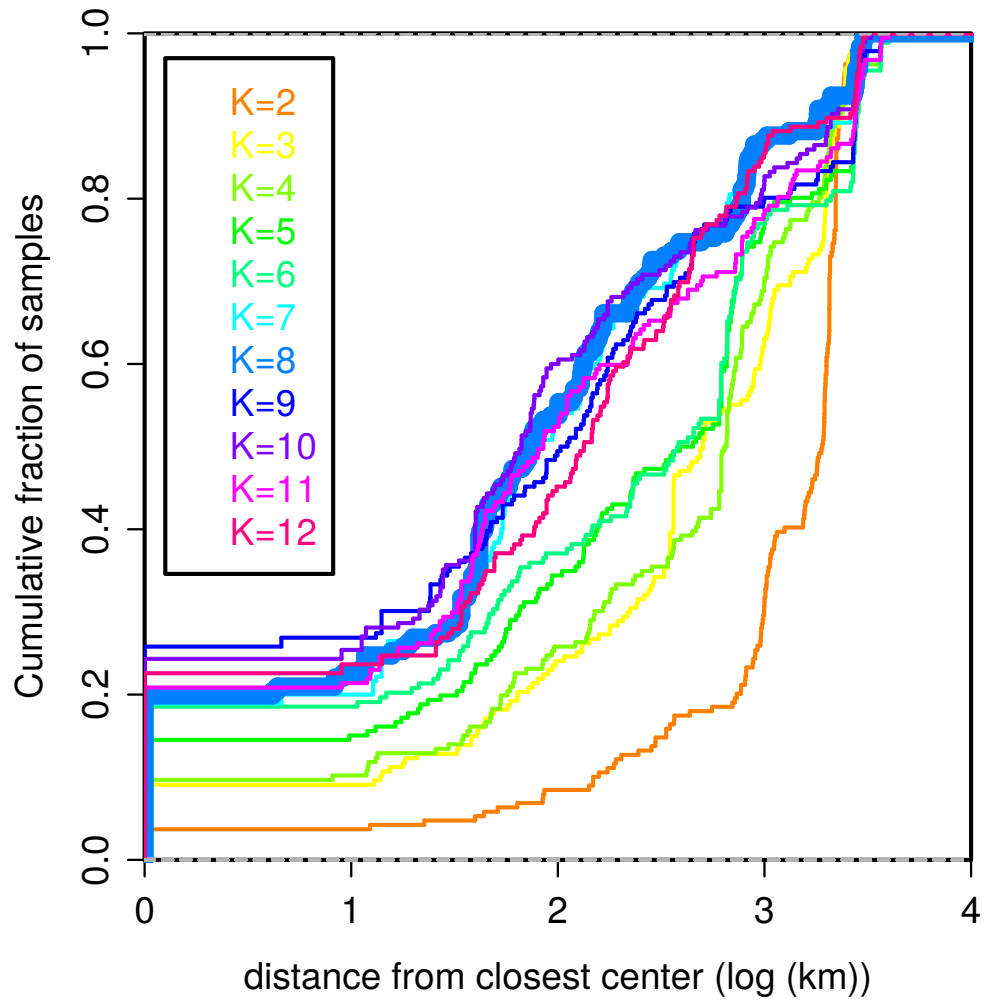

**Fig. S 6.** Predicted distance from true origin for each *M. truncatula* accession using the leave-one-out procedure, for increasing values of K. Empirical curve for K = 8 is displayed in bold.

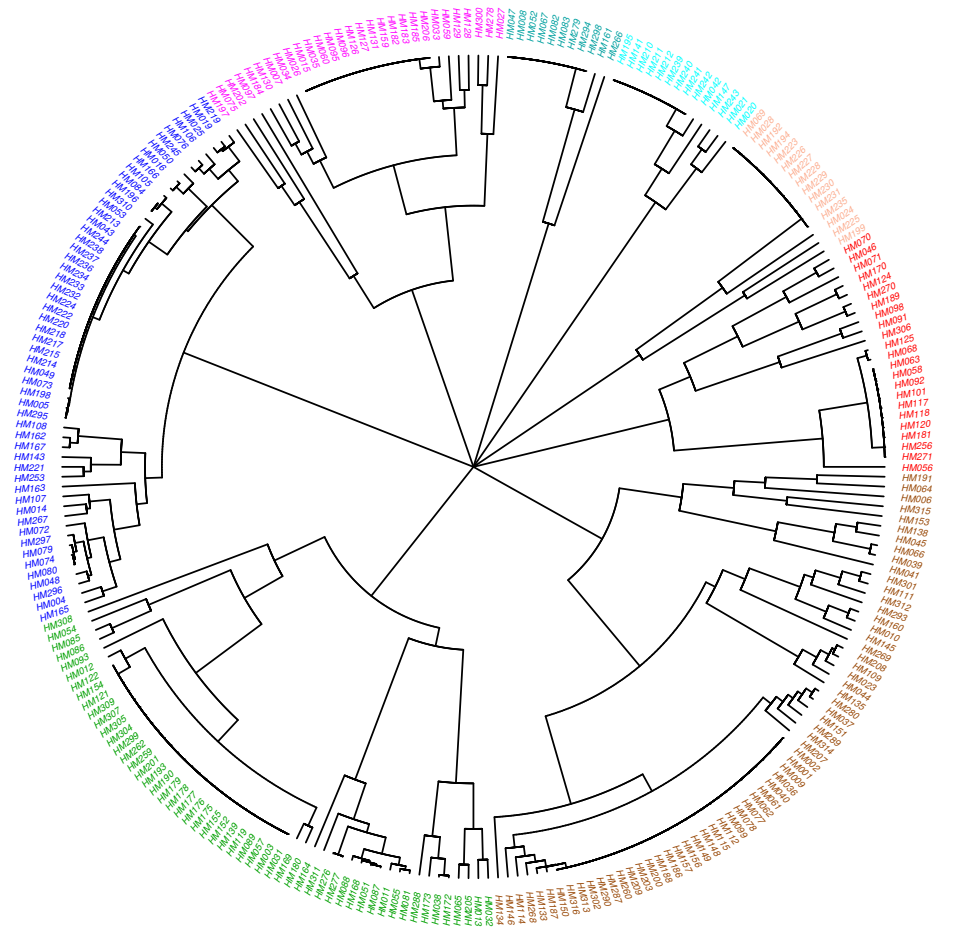

**Fig. S 7.** Hierarchical clustering of 262 *M. truncatula* accessions based on their admixture proportions, after supervised admixture analysis with  $K = 8$  putative ancestral genomes. Each color corresponds to a given component. Color coding is the same as fig. 2



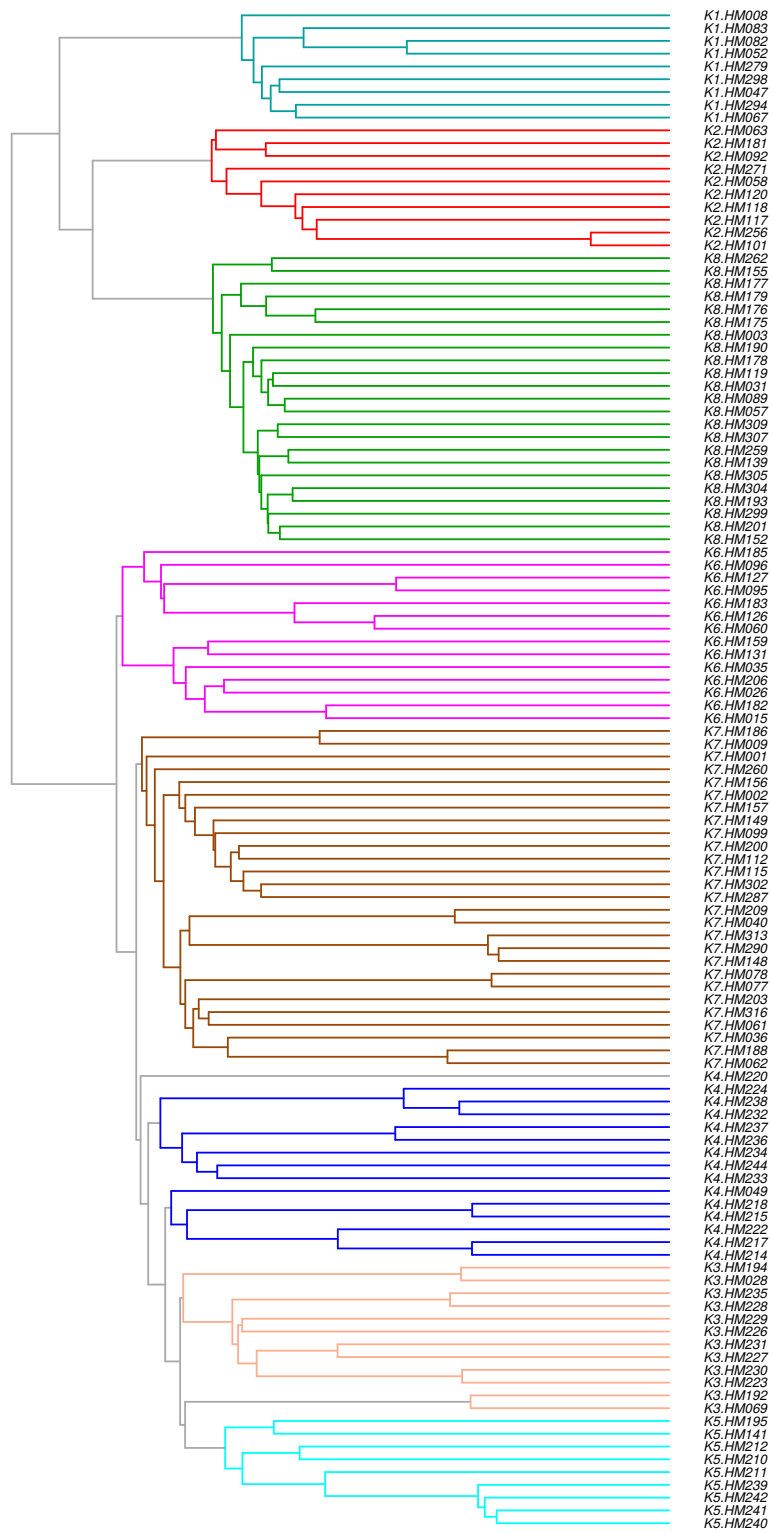

**Fig. S 8.** Dendrogram of genetic relationships between representative accessions of the eight *M. truncatula* populations, based on analysis of the 840K SNP dataset. Color coding is the same as fig. 2

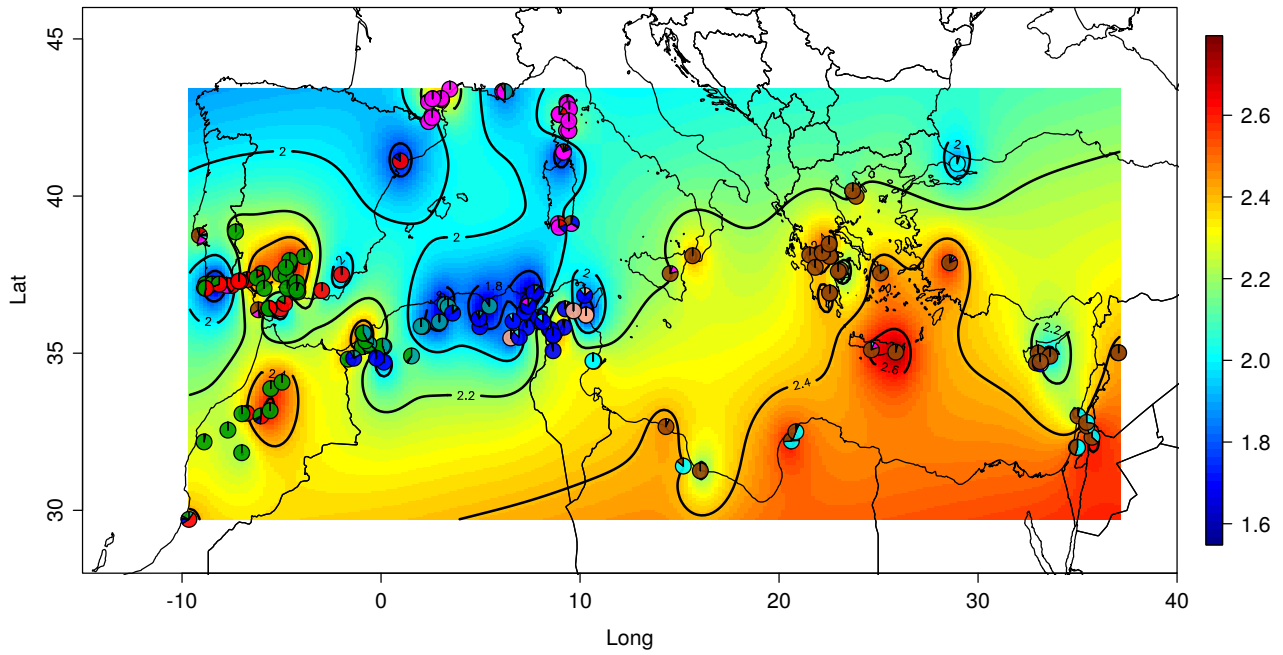

**Fig. S 9.** Geographical repartition of root-rot index following infection of 174 *M. truncatula* accessions by *Aphanomyces euteiches*. At each evaluated accession, a pie chart present the admixture patterns of it. Scale of index from resistant (blue) to susceptible (red) accessions is indicated on the right. Raw data from Bonhomme *et al.* (Bonhomme *et al.*, 2013).

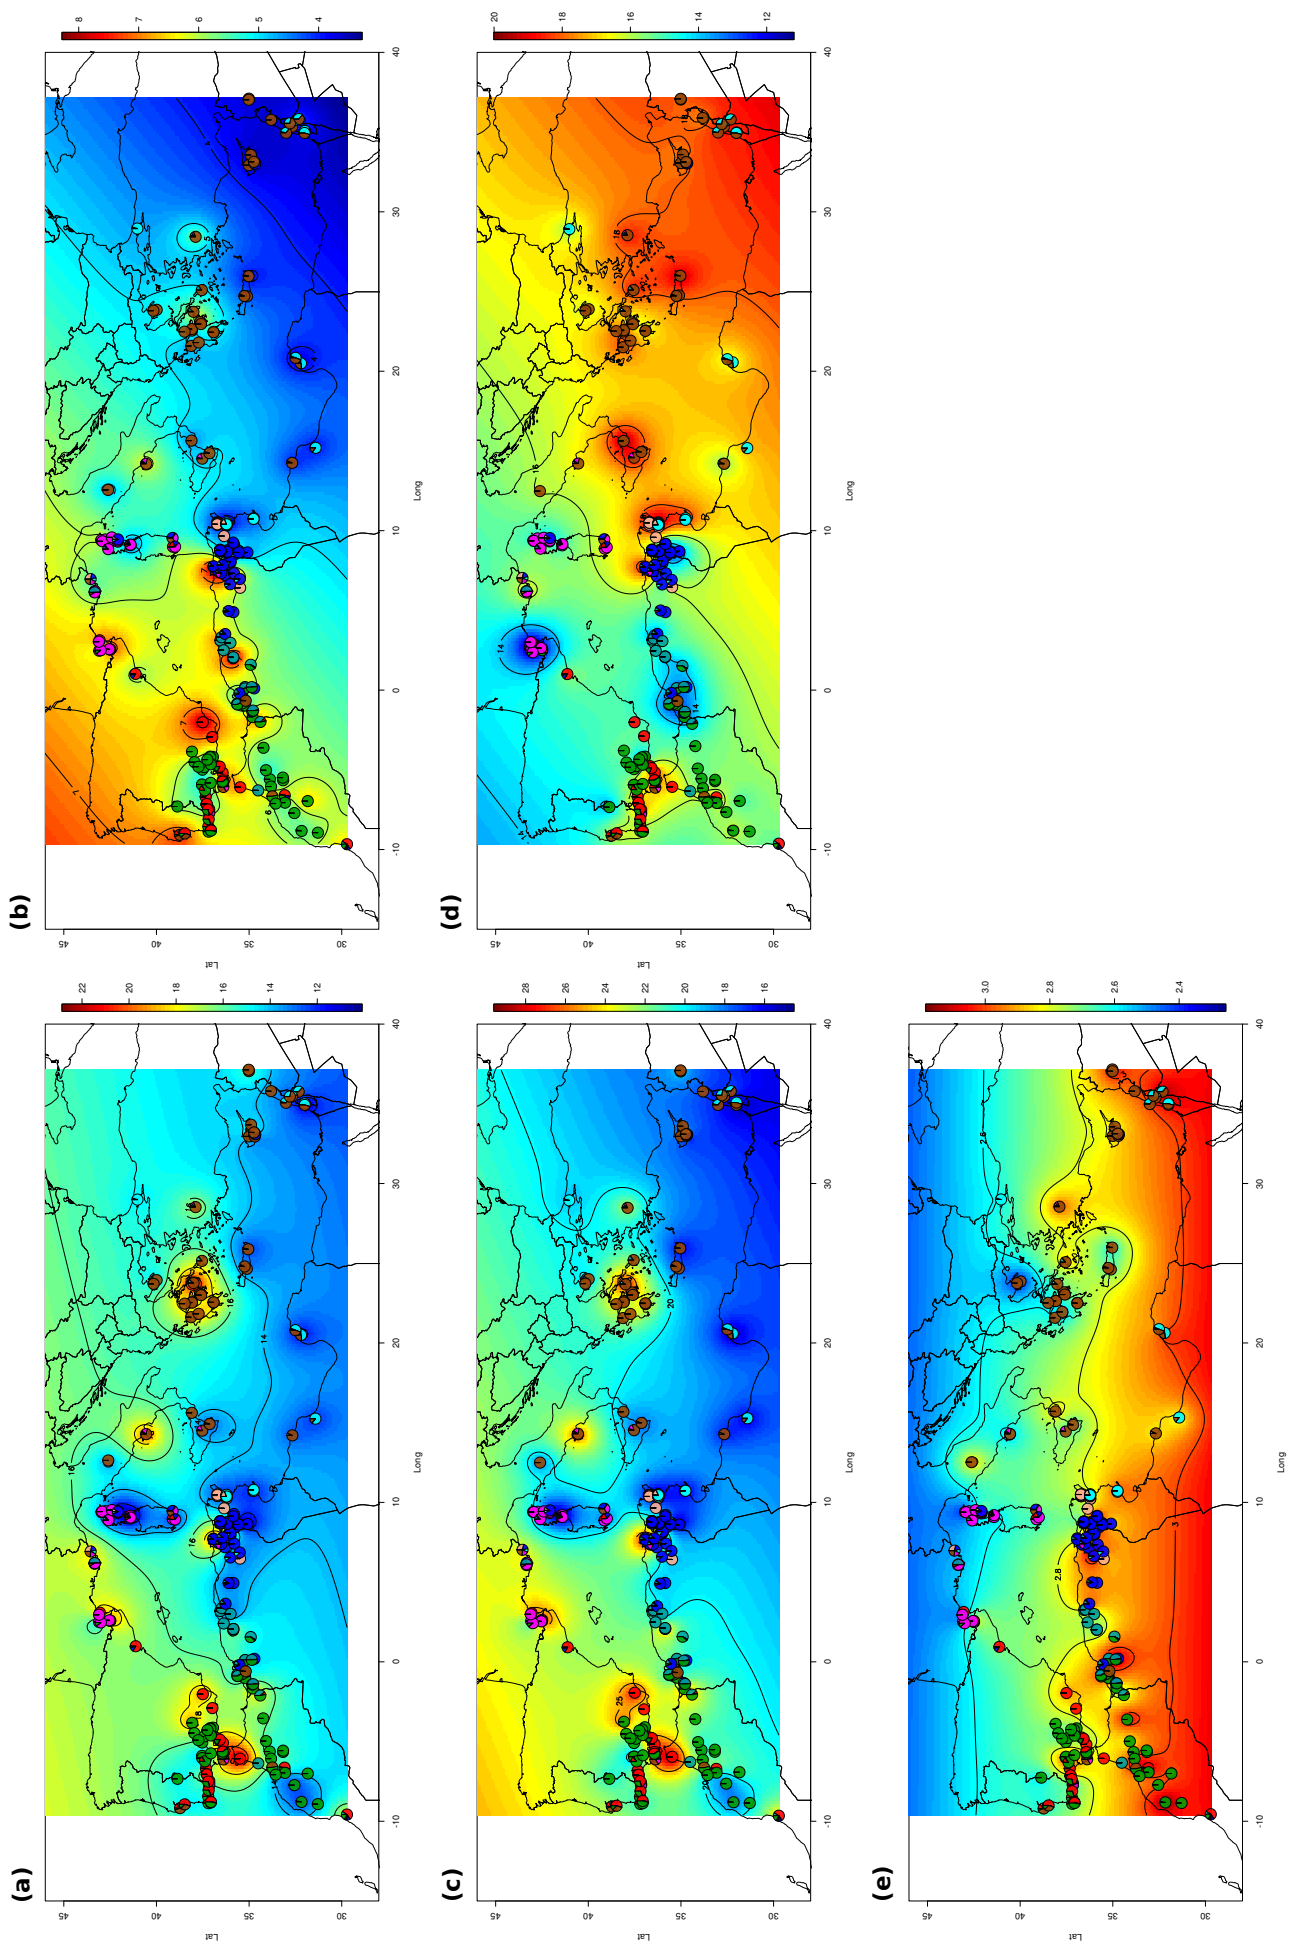

**Fig. S 10.** Geographical repartition of phenotypes for several quantitative functional traits in 226 *M. truncatula* accessions. (a) number of nodules below 5 cm of root growth. (b) number of nodules in top 5 cm of roots. (c) total number of nodules. (d) final plant height before harvest (e) number of leaves at about two weeks. Data from Stanton-Geddes *et al.* (Stanton-Geddes *et al.*, 2013)

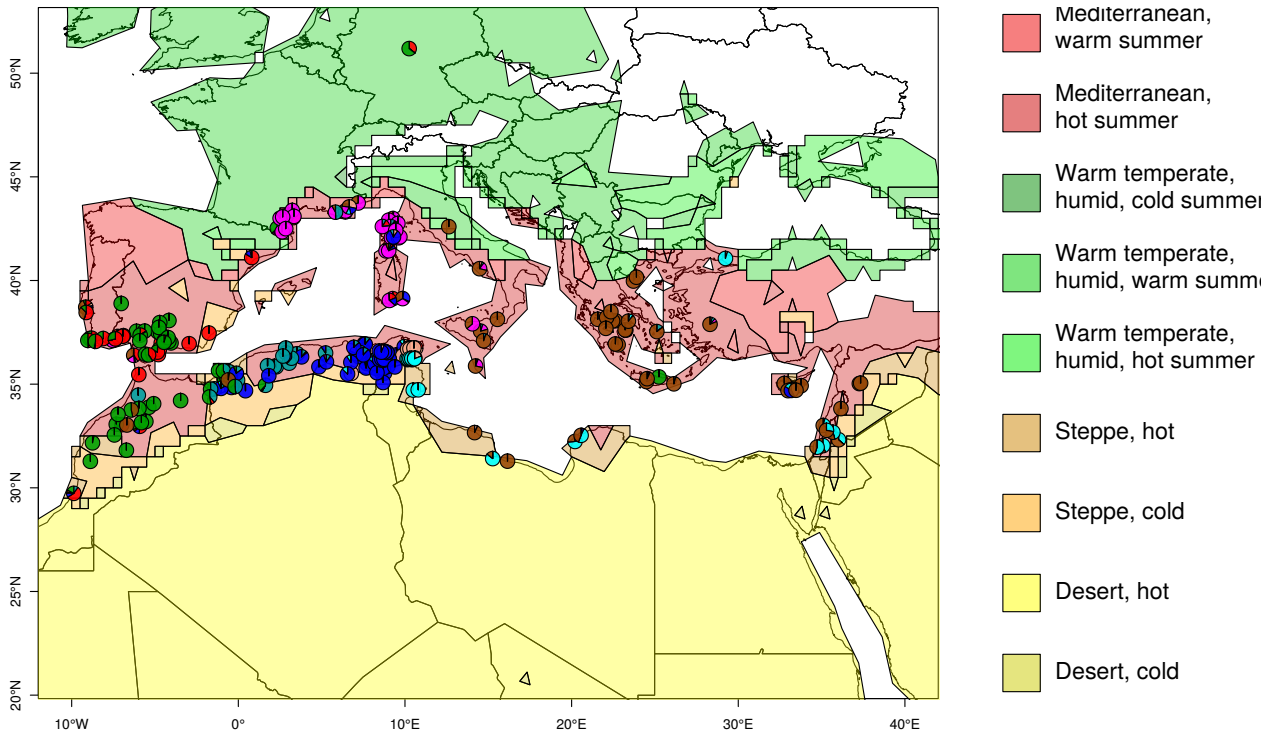

**Fig. S 11.** *M. truncatula* accessions repartition within Mediterranean Basin climatic zones following Köppen-Geiger climate classification.

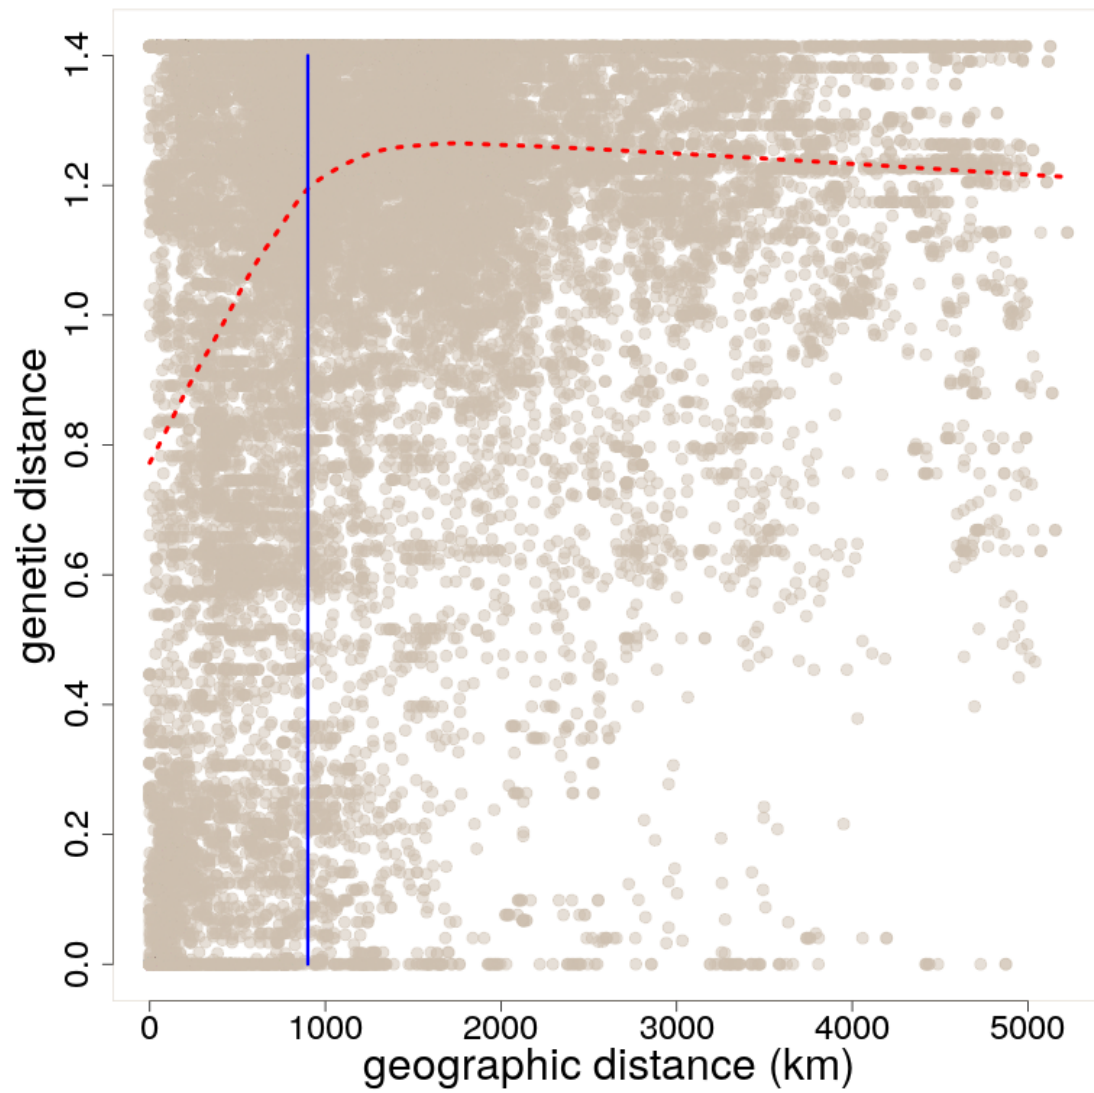

**Fig. S 12.** Relation between geographical and genetic distances among 245 *M. truncatula* accessions with known location, for  $K = 8$ . The red dotted curve is a loess adjusted curve. The vertical blue line is drawn at 950km.
